# Supplementary material
Source: publisher site journal article supplement (https://www.dovepress.com/article/supplementary_file/548327/548327%20Revised%20Supplementary%20materials_1.docx)
Supplement: Supplementary file 1 [file 548327%20Revised%20Supplementary%20materials_1.docx]

**Supplementary materials**

**Supplementary Table 1.** Study Design of the CRUISE-R Registry (Coronary Revascularization in Patients on Dialysis in China-Retrospective Registry)

| **Category** | **Key details** |
| --- | --- |
| **Study design** | |
| Study type | The CRUISE-R registry study was a nationwide, observational, multi-center cohort study. |
| Study period | From January 2015 to June 2021 |
| Primary objective | The CRUISE-R registry study aims to identify the clinical characteristics and outcomes of patients undergoing dialysis with coronary artery disease in China. |
| **Participating centers** | |
| Number of centers | Thirty |
| Participating centers | China-Japan Friendship Hospital;  West China Hospital;  Tongji Hospital,Tongji Medical College, Huazhong University of Science and Technology.  Guangdong Provincial People's Hospital;  Beijing Chaoyang Hospital;  Shengjing Hospital of China Medical University;  Second Hospital of Tianjin Medical University;  Fuwai Central China Cardiovascular Hospital;  The First Affiliated Hospital, Zhejiang University School of Medicine;  The Third People's Hospital of Chengdu;  The People's Hospital of Guangxi Zhuang Autonouous Region;  People's Hospital of Xinjiang Uygur Autonomous Region;  Emergency General Hospital;  Henan Provincial Chest Hospital;  Zhongnan Hospital of Wuhan University;  Peking university People's hospital;  Cangzhou Central Hospital of Tianjin Medical University;  Dongguan Tungwah Hospital;  Tianjin Medical University General Hospital;  Ningbo First Hospital;  Aerospace Center Hospital;  The First Affiliated Hospital of Xinjiang Medical University;  Xuanwu Hospital;  Civil Aviation General Hospital;  Peking University Shougang Hospital;  The First Affiliated Hospital, Harbin Medical University;  Fifth Affiliated Hospital of Xinjiang Medical University;  First Central Hospital of Tianjin;  Shaoxing People's Hospital;  Tianjin Union Medicine Center. |
| **Study population** | |
| Inclusion criteria | Patients who underwent coronary angiography. |
| Exclusion criteria | 1. Not on dialysis therapy (hemodialysis/peritoneal dialysis) or dialysis duration <3 months. 2. Coronary artery stenosis <50%. 3. Other indications for coronary angiography (e.g., pre-surgical evaluation, valvular heart disease, kidney transplant evaluation). 4. Readmitted patients. |
| Enrollment outcomes | Data from 455,617 consecutive cardiac catheterizations between January 2015 and June 2021 at 30 tertiary medical centers across 12 provinces in China were retrospectively reviewed. The CRUISE-R study excluded patients based on the following criteria: those who did not undergo dialysis therapy or received dialysis <3 months (n=453,421), those without ≥ 50% stenosis in any of the 3 main coronary arteries or the left main coronary artery as determined by visual assessment of coronary angiogram (n=328), and those with other indications for coronary angiography, such as surgical interventions, valve disease, and kidney transplant (n=87). For readmitted patients, only data from their initial admission were analyzed, while subsequent readmissions were documented as “readmission” events (n=532). Overall, the CRUISER study enlisted 1,249 dialysis patients suffering from obstructive coronary artery disease. |

**Supplementary Table 2.** Association between TyG index/NLR and 3-year all-cause mortality after excluding in-hospital deaths

| **Variables** | **Unadjusted** | | **Model I** | | **Model II** | |
| --- | --- | --- | --- | --- | --- | --- |
| **HR (95% CI)** | ***p*-value** | **HR (95% CI)** | ***p*-value** | **HR (95% CI)** | ***p*-value** |
| **TyG, continuous** | 1.31 (1.11, 1.55) | 0.002 | 1.32 (1.12, 1.56) | 0.001 | 1.22 (1.02, 1.46) | 0.026 |
| **TyG, category** |  |  |  |  |  |  |
| **TyG < 8.981** | reference |  | reference |  | reference |  |
| **TyG ≥ 8.981** | 1.68 (1.28, 2.19) | <0.001 | 1.69 (1.29, 2.21) | <0.001 | 1.10 (0.78, 1.56) | 0.001 |
| **NLR, continuous** | 1.03 (1.01, 1.05) | 0.010 | 1.02 (1.00, 1.04) | 0.015 | 1.02 (1.00, 1.05) | 0.029 |
| **NLR, category** |  |  |  |  |  |  |
| **NLR < 4.941** | reference |  | reference |  | reference |  |
| **NLR≥4.941** | 1.77 (1.37, 2.30) | <0.001 | 1.79 (1.38, 2.32) | <0.001 | 1.55 (1.18, 2.04) | 0.002 |

Model I: adjusted for age and sex.

Model II: further adjusted for manifestations of coronary heart disease, hypertension, diabetes, atrial fibrillation, cerebrovascular disease, admission treatment method, left main coronary disease, three-vessel disease, systolic blood pressure, diastolic blood pressure, heart rate, current smoking and medications including ACEI/ARB, beta-blocker, statin, dual anti-platelet.

HR, hazard ratio; CI, confidence interval; TyG, triglyceride-glucose index; NLR, neutrophil-lymphocyte ratio.

**Supplementary Table 3.** Association between TyG index/NLR and 3-year all-cause mortality after excluding patients with hypoglycemia, leukopenia, and lymphocytopenia

| **Variables** | **Unadjusted** | | **Model I** | | **Model II** | |
| --- | --- | --- | --- | --- | --- | --- |
| **HR (95% CI)** | ***p*-value** | **HR (95% CI)** | ***p*-value** | **HR (95% CI)** | ***p*-value** |
| **TyG, continuous** | 1.31 (1.10, 1.57) | 0.003 | 1.33 (1.11, 1.59) | 0.002 | 1.23 (1.01, 1.48) | 0.036 |
| **TyG, category** |  |  |  |  |  |  |
| **TyG < 8.981** | reference |  | reference |  | reference |  |
| **TyG ≥ 8.981** | 1.80 (1.35, 2.30) | <0.001 | 1.84 (1.38, 2.45) | <0.001 | 1.75 (1.29, 2.36) | <0.001 |
| **NLR, continuous** | 1.05 (1.02, 1.09) | <0.001 | 1.06 (1.03, 1.09) | <0.001 | 1.04 (1.00, 1.07) | 0.048 |
| **NLR, category** |  |  |  |  |  |  |
| **NLR < 4.941** | reference |  | reference |  | reference |  |
| **NLR≥4.941** | 1.72 (1.32, 2.24) | <0.001 | 1.73 (1.33, 2.26) | <0.001 | 1.38 (1.04, 1.83) | 0.024 |

Model I: adjusted for age and sex.

Model II: further adjusted for manifestations of coronary heart disease, hypertension, diabetes, atrial fibrillation, cerebrovascular disease, admission treatment method, left main coronary disease, three-vessel disease, systolic blood pressure, diastolic blood pressure, heart rate, current smoking and medications including ACEI/ARB, beta-blocker, statin, dual anti-platelet.

HR, hazard ratio; CI, confidence interval; TyG, triglyceride-glucose index; NLR, neutrophil-lymphocyte ratio.

**Supplementary Figure 1.** ROC curves of different inflammatory scores and lipid-derived indices with all-cause death

**
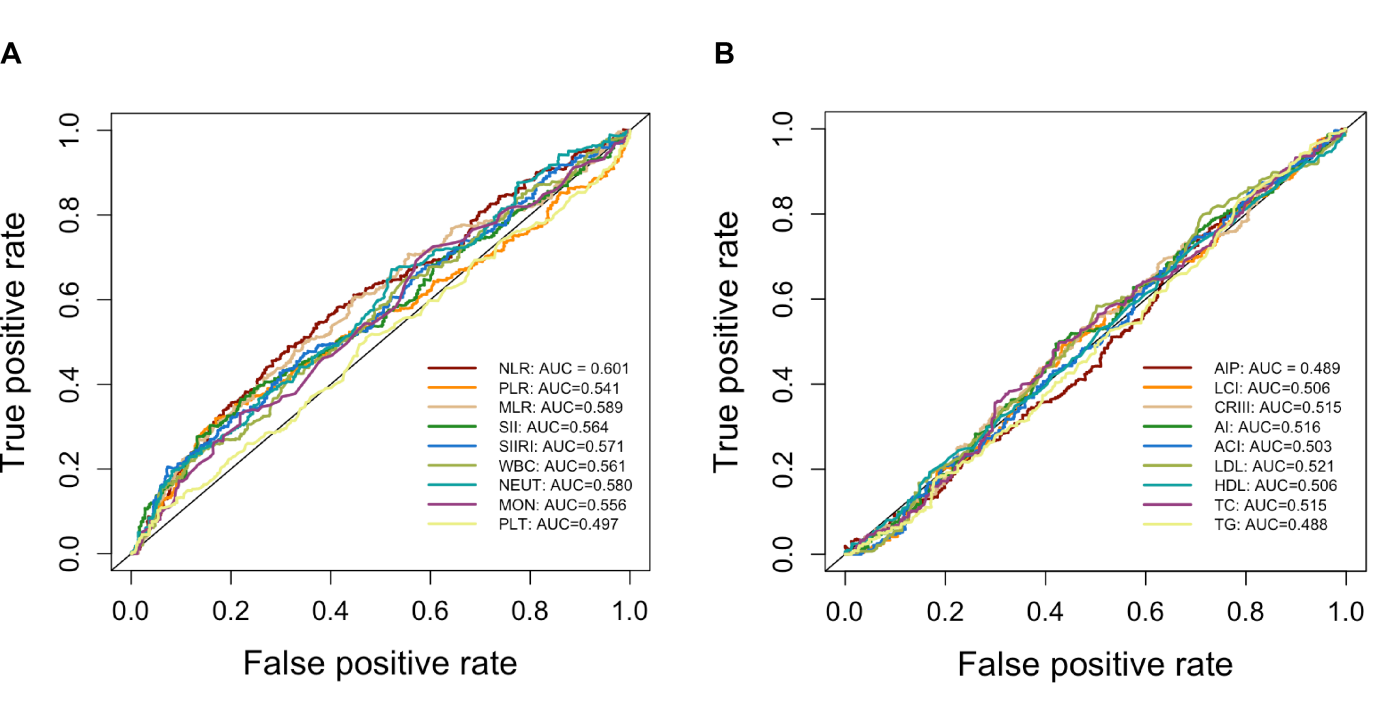
**

ROC curves of different inflammatory scores (A) and lipid-derived indices (B) with all-cause death. NLR, neutrophil-lymphocyte ratio; PLR, platelet-lymphocyte ratio; MLR, monocyte-lymphocyte ratio; SII, systemic immune inflammation index; SIIRI, systemic immune inflammatory response index; WBC, white blood cell; NEUT, neutrophil; MON, monocyte; PLT, platelet; AIP, atherogenic index of plasma; LCI, lipoprotein combine index; CRIII, Castelli’s risk index-II; AI, atherosclerosis index; ACI, atherogenic combined index; LDL, low-density lipoprotein cholesterol; HDL, high-density lipoprotein cholesterol; TC, total cholesterol; TG, triglyceride.

**Supplementary Figure 2.** Correlation between TyG index and NLR.


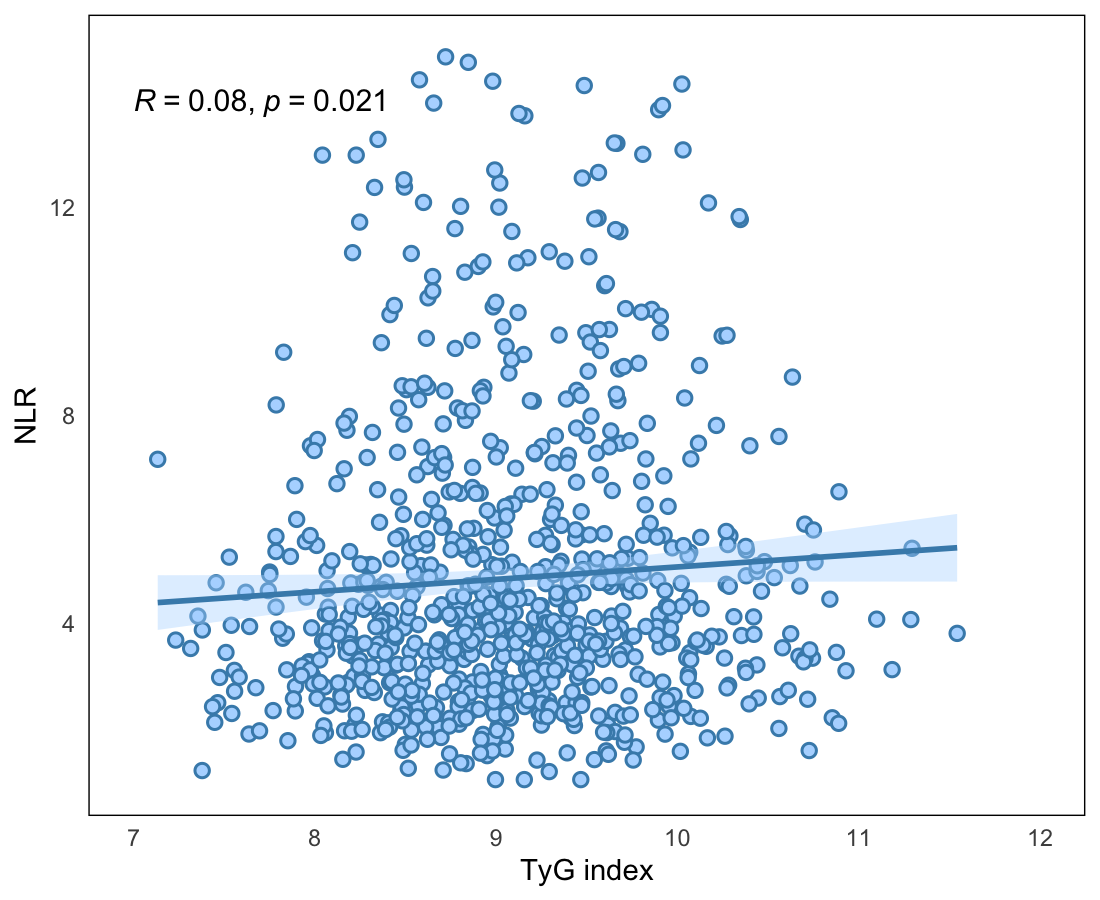


TyG, triglyceride-glucose index; NLR, neutrophil-lymphocyte ratio.

**Supplementary Figure 3.** ROC curves of TyG index and NLR for all-cause mortality


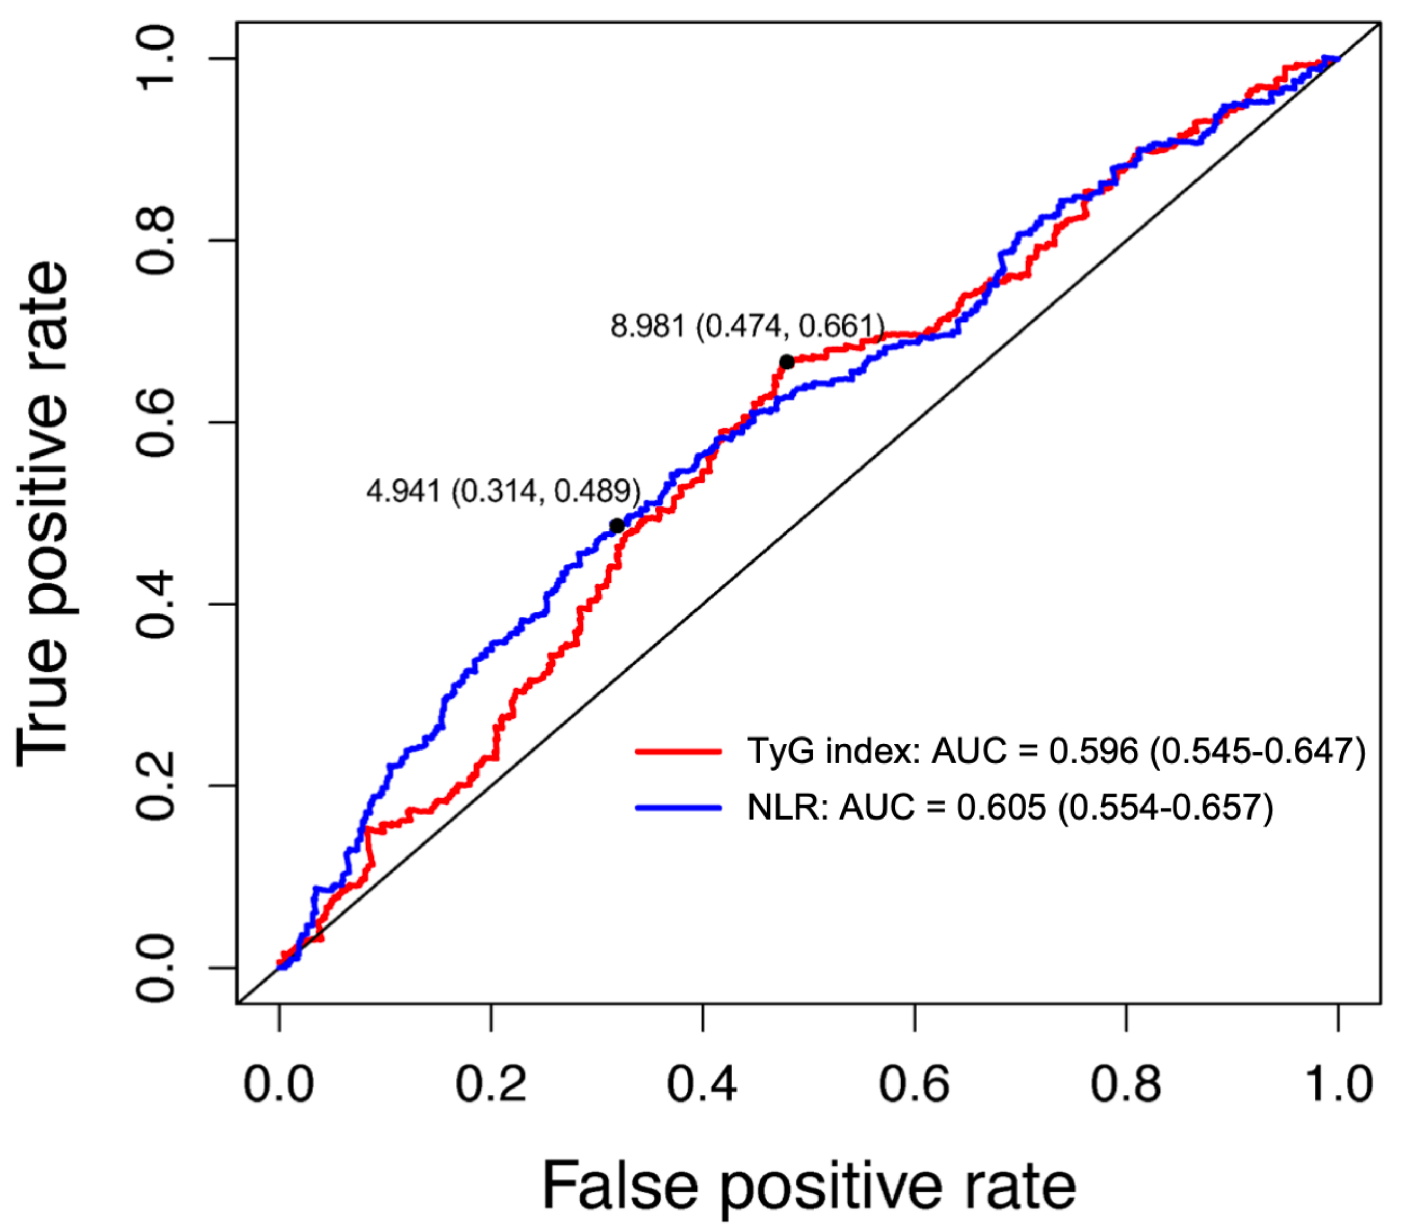


ROC curves of TyG index and NLR for all-cause mortality (TyG index: 0.596, NLR: 0.605, *p* = 0.220). The optimal threshold of TyG index was 8.981, with a sensitivity of 66.1% and a specificity of 52.6%.The optimal threshold of NLR was 4.941, the sensitivity was 48.9%, and the specificity was 68.6%.

**Supplementary Figure 4.** Cumulative event rate curves of all-cause death in combination with TyG index and NLR


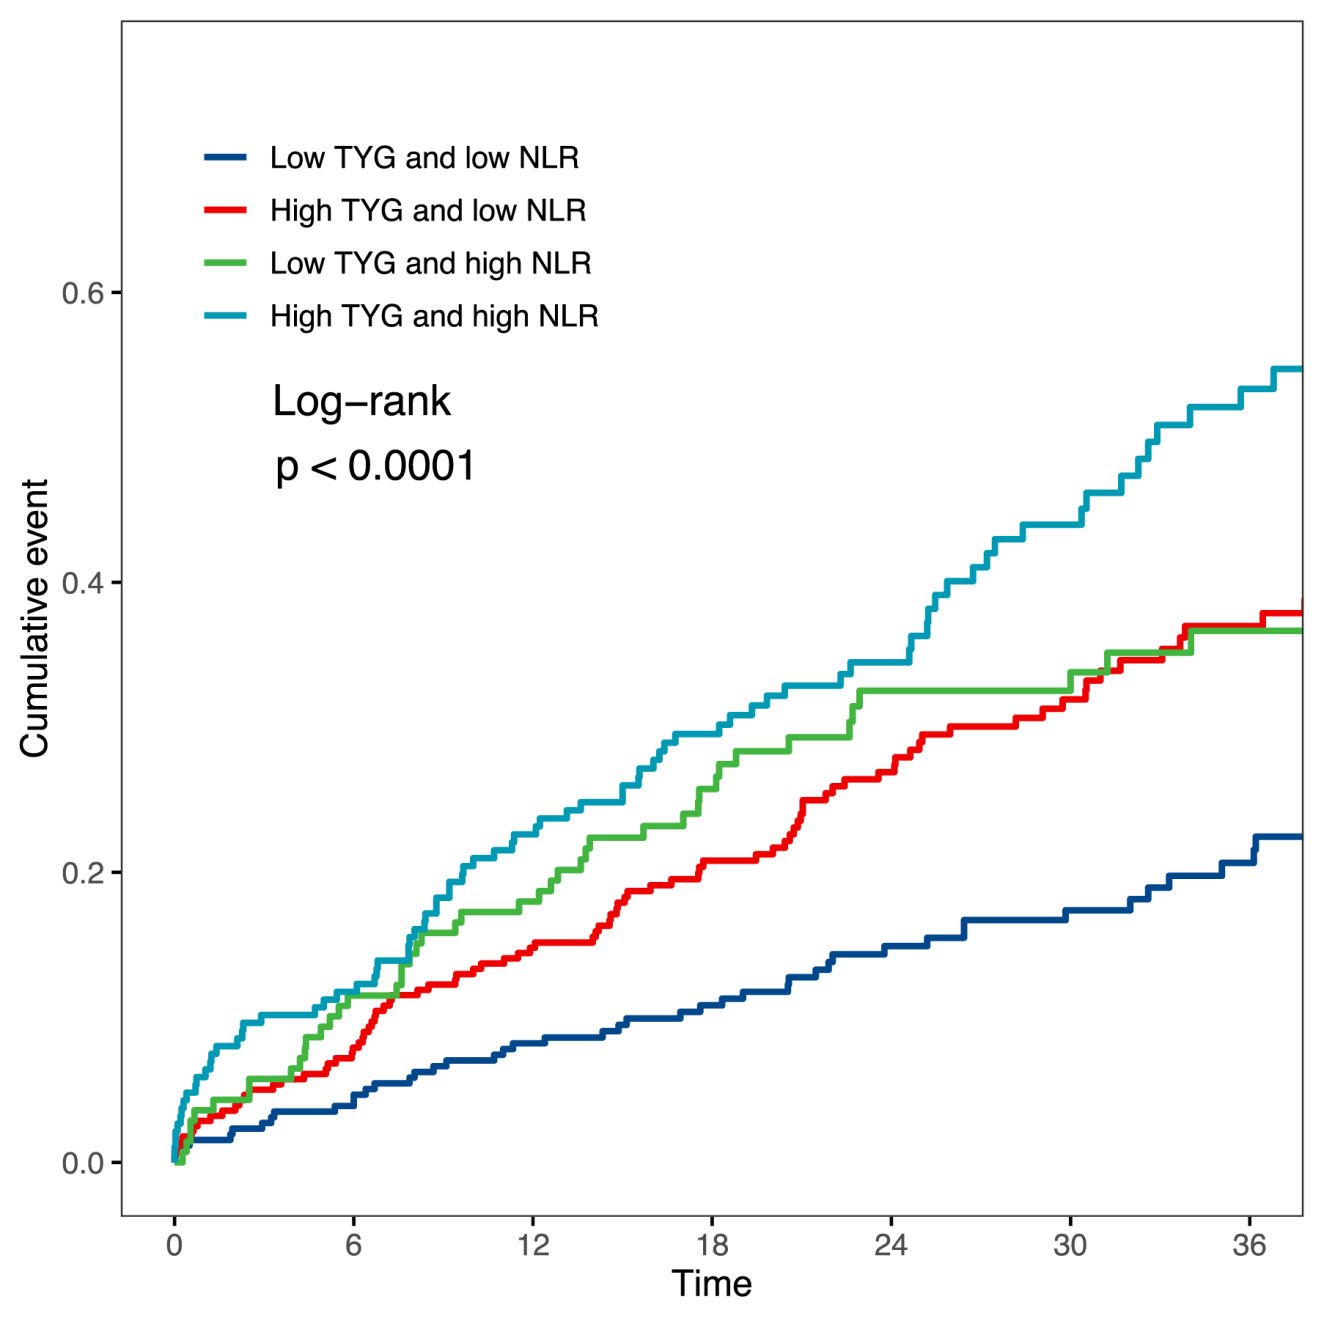


Cumulative event rate curves of death in combination with TyG index and NLR. TyG index, triglyceride-glucose index; NLR, neutrophil-lymphocyte ratio.

**Supplementary Figure 5.** Subgroup analysis of TyG index and NLR with all-cause death.


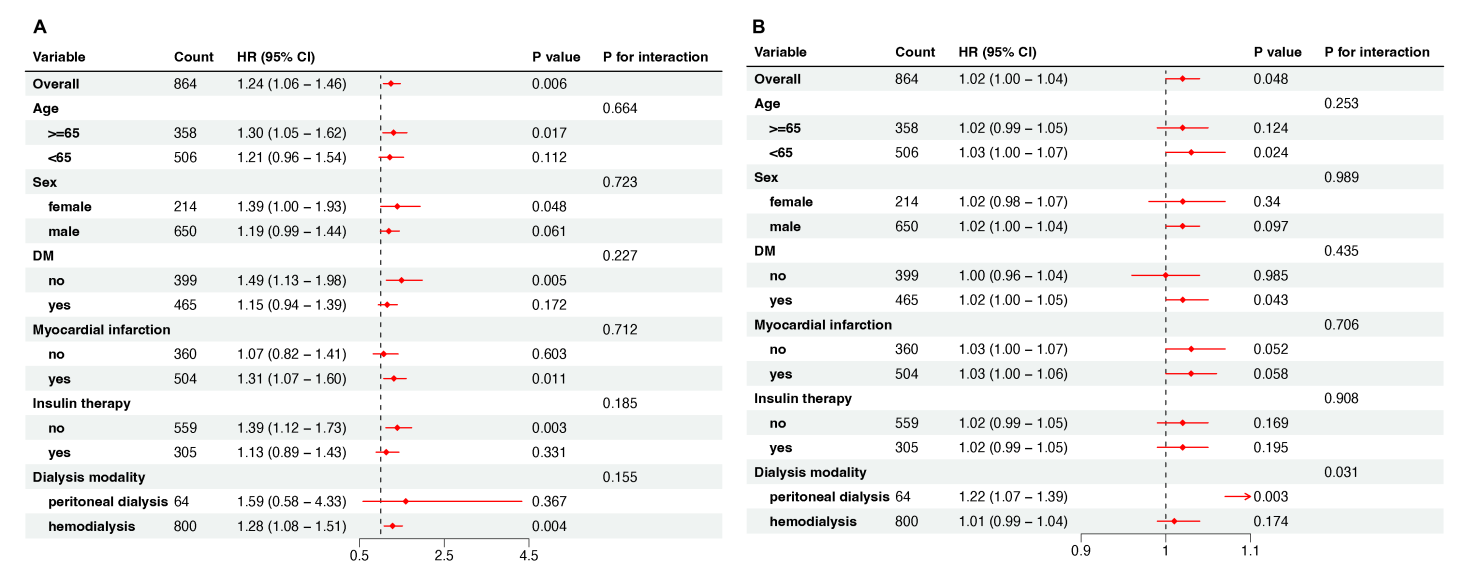


1. Forest plot for subgroup analysis of the TyG index and all-cause death. (B) Forest plot for subgroup analysis of NLR and all-cause death. TyG index, triglyceride-glucose index; NLR, neutrophil - lymphocyte ratio; DM, diabetes mellitus. Adjusted for Model II in the Cox regression analysis.
